# Predicting species and community responses to global change in Australian mountain ecosystems using structured expert judgement

James S. Camac<sup>1,2,\*</sup>, Kate D.L. Umbers<sup>3,4</sup>, John W. Morgan<sup>2,5</sup>, Sonya R. Geange<sup>6</sup>, Anca Hanea<sup>1</sup>, Rachel A. Slatyer<sup>6</sup>, Keith L. McDougall<sup>7</sup>, Susanna E. Venn<sup>8</sup>, Peter A. Vesk<sup>9</sup>, Ary A. Hoffmann<sup>10</sup>, Adrienne B. Nicotra<sup>6</sup>

<sup>1</sup>Centre of Excellence for Biosecurity Risk Analysis, School of BioSciences, The University of Melbourne, Parkville 3010, Victoria, Australia

<sup>2</sup>Research Centre for Applied Alpine Ecology, La Trobe University, Bundoora 3086, Victoria, Australia

<sup>3</sup>School of Science, Western Sydney University, Penrith 2751, New South Wales, Australia

<sup>4</sup>Hawkesbury Institute for the Environment, Western Sydney University, Penrith 2751, New South Wales, Australia

<sup>5</sup>Department of Ecology, Environment and Evolution, La Trobe University, Bundoora 3086, Victoria, Australia

<sup>6</sup>Research School of Biology, Australian National University, Acton, 2601 Australian Capital Territory, Australia

<sup>7</sup>NSW Department of Planning, Industry and Environment, Queanbeyan 2620, New South Wales, Australia

<sup>8</sup>Centre for Integrative Ecology, School of Life and Environmental Sciences, Deakin University, Burwood 3125, Victoria, Australia

<sup>9</sup>School of BioSciences, The University of Melbourne, Parkville 3010, Victoria, Australia

<sup>10</sup>School of BioSciences, Bio21 Institute, The University of Melbourne, Parkville 3010, Victoria, Australia

\*correspondence: [james.camac@gmail.com](mailto:james.camac@gmail.com)

**Running head:** Alpine species and community responses to global change

**Article Impact Statement:** Expert knowledge is used to quantify the adaptive capacity and thus, the risk posed by global change, to Australian mountain flora and fauna.

**Keywords:** adaptive capacity, alpine, biodiversity conservation, climate change, expert elicitation, exposure risk

## 1 **Abstract**

2 Conservation managers are under increasing pressure to make decisions about the allocation of finite  
3 resources to protect biodiversity under a changing climate. However, the impacts of climate and  
4 global change drivers on species are outpacing our capacity to collect the empirical data necessary to  
5 inform these decisions. This is particularly the case in the Australian Alps which has already  
6 undergone recent changes in climate and experienced more frequent large-scale bushfires. In lieu of  
7 empirical data, we used a structured expert elicitation method (the IDEA protocol) to estimate the  
8 abundance and distribution of nine vegetation groups and 89 Australian alpine and subalpine species  
9 by the year 2050. Experts predicted that most alpine vegetation communities would decline in extent  
10 by 2050; only woodlands and heathlands were predicted to increase in extent. Predicted species-level  
11 responses for alpine plants and animals were highly variable and uncertain. In general, alpine plants  
12 spanned the range of possible responses, with some expected to increase, decrease or not change in  
13 cover. By contrast, almost all animal species were predicted to decline or not change in abundance or  
14 elevation range; more species with water-centric life-cycles were expected to decline in abundance  
15 than other species. In the face of rapid change and a paucity of data, the method and outcomes outlined  
16 here provide a pragmatic and coherent basis upon which to start informing conservation policy and  
17 management, although this approach does not diminish the importance of collecting long-term  
18 ecological data.

19

20 **Keywords:** adaptive capacity, alpine, biodiversity conservation, climate change, expert elicitation,  
21 exposure risk

## 22 **Introduction**

23 Alpine, subalpine and montane species are predicted to be negatively impacted by climate change.  
24 For the most part, this is because the climate envelope for many mountain species is expected to  
25 shrink and, in some regions, disappear entirely as a consequence of increased global temperatures  
26 (Halloy & Mark 2003; La Sorte & Jetz 2010; Freeman et al. 2018). While range contractions have  
27 already been observed in some mountain plants (Grabherr et al. 1994; Lenoir et al. 2008; Steinbauer  
28 et al. 2020) and animals (Freeman et al. 2018, Wilson et al. 2005), not all species are responding to  
29 climate change in the same way (Lenoir et al. 2010; Tingley et al. 2012; Gibson-Reinemer & Rahel  
30 2015). What remains unclear is the capacity of mountain species to adapt (Hargreaves et al. 2014;  
31 Michalet et al. 2014; Normand et al. 2014; Louthan et al. 2015), and the characteristics that allow  
32 species to persist in the face of a changing climate (Fordham et al. 2012; Foden et al. 2018).

33

34 To understand the complexities and uncertainties of species responses to climate change, there have  
35 been several attempts to quantify adaptive capacity (Foden et al. 2013; Ofori et al. 2017; Gallagher  
36 et al. 2019). Adaptive capacity describes the ability of systems and organisms to persist and adjust to  
37 threats, to take advantage of opportunities, and/or to respond to change (Millenium Ecosystem  
38 Assessment 2005; IPCC 2014). Adaptive capacity confers resilience to perturbation, allowing  
39 ecological systems to reconfigure themselves with change (Holling 1973). In the context of alpine  
40 biota in Australia, adaptive capacity is the ability of species to maintain their often limited  
41 geographical distributions and population abundance when the climate and other factors are altered.  
42 While the underlying factors determining adaptive capacity encompass genetic and epigenetic  
43 variation, life history traits and phenotypic plasticity (Dawson et al. 2011; Ofori et al. 2017), little is  
44 known about which taxa have high adaptive capacity, how to quantify it, how it varies within and  
45 across related species, or how to manage populations in order to maximise it. As a consequence, data  
46 required to advise on the adaptive capacity of species are lacking.

47

48 Nonetheless, conservation practitioners and land managers are under increasing pressure to make  
49 decisions about the allocation of finite resources used to conserve biodiversity under climate change.  
50 Decisions are typically based on vulnerability assessments that incorporate exposure risk, species  
51 sensitivity, and adaptive capacity (Foden et al. 2013; Ofori et al. 2017; Foden et al. 2018). Until now,  
52 assessments of potential climate change impacts on species that cover multiple taxonomic groups  
53 have been based primarily on species distribution models (e.g. Thomas et al. 2004; Lawler et al. 2009;  
54 La Sorte & Jetz 2010). Incorporating species' physiological, ecological and evolutionary  
55 characteristics, in conjunction with their predicted climate change exposure, will likely facilitate  
56 accurate identification of the species most at risk from climate change (Briscoe et al. 2020). However,  
57 these assessments focus on changes in species' distribution or extent, their 'climate space', and the  
58 abiotic and biotic stresses that affect population ecology and physiology are not always fully  
59 represented in them (Guisan & Thuiller 2005; Geyer et al. 2011; Fordham et al. 2012). Further, the  
60 required data are rarely available for most species and the technical skill and time required to build  
61 and fit relevant models restrict their use to specialists (Briscoe et al. 2020). Given that the rate of  
62 climate change impacts has already outpaced our capacity to collect the required data to assess species  
63 empirically, it is important to utilise alternative methods that make use of existing expertise across  
64 taxa to estimate adaptive capacity and identify conservation priorities (Granger Morgan et al. 2001).

65

66 The need to predict how species will respond to climate change is particularly pertinent to the  
67 Australian alpine ecosystem which has a high level of endemism and a restricted geographic range  
68 (Venn et al. 2017). Since 1979, mean spring temperatures in the Australian Alps have risen by  
69 approximately 0.4 °C and annual precipitation has fallen by 6% (Wahren et al. 2013), with a  
70 consequent decline in snow pack depth (Sanchez-Bayo & Green 2013). Snow cover in Australia is  
71 now at its lowest in the past 2000 years (McGowan et al. 2018). These climatic changes correlate  
72 with changes in floristic structure, abundance and diversity (Wahren et al. 2013; Camac et al. 2015)

73 and increases in fire frequency and severity (Camac et al. 2017; Zylstra 2018). Changes are expected  
74 to threaten the many locally adapted and endemic species, with cascading effects on biodiversity and  
75 ecosystem services such as carbon storage and water yield.

76

77 Here, we used a structured expert elicitation framework called the IDEA (“Investigate”, “Discuss”,  
78 “Estimate” and “Aggregate”) protocol (Hemming et al. 2018) to quantify changes in Australian alpine  
79 species’ future abundance in light of the many threats to their persistence. Structured expert elicitation  
80 provides a robust framework to estimate risk when data are either inadequate or lacking entirely  
81 (Hemming et al. 2018). While structured expert elicitation is increasingly being used in policy and  
82 management, few examples of its use exist in the ecological and conservation literature (Hemming et  
83 al. 2018). Expert elicitation quantitatively harnesses the local knowledge of biologists, conservation  
84 scientists, and natural resource managers to make predictions about critical but data-poor processes.

85

86 In this study, 37 experts (Table S1) estimated changes in the future abundance and/or distribution of  
87 nine Australian alpine plant communities, 60 alpine plant species and 29 mountain animal species.  
88 Expert knowledge provided insights into the species’ attributes and the biotic and abiotic factors that  
89 were expected to influence a species’ adaptive capacity. Using these expert elicited data, we:

- 90 1. quantified the direction and magnitude of change in cover/abundance/elevation range of  
91 Australian mountain plant communities as well as individual plant and animal species to  
92 climatic changes expected by 2050;
- 93 2. examined species attributes and biotic and abiotic factors that experts used when predicting  
94 changes in community and species abundances and how they compared to broad concepts  
95 about determinants of adaptive capacity, and;

96 3. examined how various measurable species attributes correlated with predicted changes in  
97 plant species abundance.

98

## 99 **Methods**

### 100 *Study system*

101

102 Australian high mountain ecosystems are restricted to south-eastern Australia, occupying an area ~  
103 11700 km<sup>2</sup>, or 0.15% of the continent. They are comparatively low in elevation, barely exceeding  
104 2000 m a.s.l, ancient and mostly covered in soils. There is no nival zone or areas of permanent snow  
105 and some alpine areas of Tasmania even remain snow-free during the winter (Venn et al. 2017).

106

107 Australian mainland alpine ecosystems encompass several plant communities characterised by  
108 different species and growth forms (Kirkpatrick & Bridle 1999; Williams et al. 2006; Venn et al.  
109 2017). Heathland predominates on relatively steep sheltered slopes where alpine humus soils are  
110 shallow (<0.3 m deep). The shrubs are 1–2 m tall, with a canopy cover typically exceeding 70%.  
111 Grassland/herbfield complexes occupy the more level ground on slopes and hollows, some of which  
112 may be subject to severe winds and frost, and where the alpine humus soils are deepest (generally up  
113 to 1 m). Short herbfields (i.e. snowpatch vegetation) occur on steep, leeward, south- to east-facing  
114 slopes where snow persists well into the spring or summer (Venn et al. 2017). Feldmark are an  
115 extremely rare ecosystem, existing only on exposed rocky ridges consisting of prostrate, hardy shrubs  
116 of the family Ericaceae. Wetland complexes consist of heathlands, bogs and fens and occupy valley  
117 bottoms, drainage lines and some stream banks and are typically waterlogged for at least one month  
118 per year. Wet tussock grasslands are regularly inundated with water or snowmelt, also at lower parts

119 of the landscape. Woodlands are dominated by multi-stemmed, slow-growing trees (*Eucalyptus*  
120 *pauciflora*) and are typically snow-covered for at least one month each year.

121

122 The abundance and activity of the animals are regulated by the seasons (Green & Osborne 1994;  
123 Green & Stein 2015). The fauna consists of seasonal migrants and alpine specialists and is dominated  
124 by insects and other invertebrates (Green & Osborne 1994, Green & Slatyer 2020). Many species  
125 appear to be semelparous and require the snow pack to protect their overwintering eggs (e.g.  
126 *Kosciuscola* grasshoppers). Others, such as the *Monistria* grasshoppers, can overwinter as adults in  
127 the subnival space by supercooling and thus have overlapping generations. Many Australian alpine  
128 insects exhibit iconic behaviour such as the long-distance migration of bogong moths (*Agrotis infusa*)  
129 (Warrant et al. 2016) or the striking startle display of the mountain katydid (*Acripeza reticulata*)  
130 (Umbers & Mappes 2015). The streams and wetlands support large alpine crayfish (*Euastacus spp.*),  
131 endemic earthworms (e.g. *Notoscolex montiskosciuskoï*), galaxiid fish, and several terrestrial-  
132 breeding frogs. The reptile diversity includes elapid snakes and many skink species. Most birds leave  
133 the alps in winter, returning to forage each summer. The only alpine endemic marsupial, the mountain  
134 pygmy possum (*Burramys parvus*), hibernates in boulder fields under the snow (Geiser & Broome  
135 1991) while other mammals, such as wombats and echidnas, remain active throughout winter.

136

### 137 ***Applying the IDEA protocol for structured expert elicitation***

138 We utilised the IDEA protocol for structured elicitation of expert judgement (Hemming et al. 2018;  
139 Fig S1). This protocol involved: 1) recruiting a diverse group of experts to answer questions with  
140 probabilistic or quantitative responses; 2) discussing the questions (Table S2) and clarifying their  
141 meaning, and then providing private, individual best estimates and associated credible intervals, often  
142 using either a 3-point (i.e. best estimate, lower and upper limit; animal workshop) or 4-point (i.e. best

143 estimate, lower and upper limit and confidence that the true value falls within those limits; plant  
144 workshop) elicitation method (Spiers-Bridge et al. 2010); 3) providing feedback on the experts'  
145 estimates in relation to other experts; 4) discussing the results as a group, resolving different  
146 interpretations of the questions, sharing reasoning and evidence, and then providing a second and  
147 final private estimate, and; 5) aggregating experts' final estimates mathematically, including  
148 exploration of performance based weighting schemes of aggregation (see also Supplemental  
149 Material).

150

151 The plant and animal expert elicitation projects were undertaken in July 2017 and November 2018,  
152 respectively. Because there is no accepted method to quantify or compare adaptive capacity across  
153 plants and animals, we developed questions based on estimates of percent cover for plants or  
154 abundance/elevation range for animals for the present day and in 2050. Experts ( $n = 22$  for plants,  $n$   
155  $= 17$  for animals,  $n = 2$  shared between workshops; Table S1) were selected to represent a breadth of  
156 expertise in alpine botany, zoology and ecology in Australia. In the plant workshop, experts estimated  
157 the current (2017) and the 2050 cover of 60 plant species (Table S4), with 10 to 15 representative  
158 species in each of five dominant alpine vegetation communities. Furthermore, experts estimated the  
159 future landscape cover of nine alpine/subalpine vegetation community complexes based on an agreed  
160 2017 baseline cover: feldmark (0.1%), snowpatch (1%), grassland/herbfield (25%), woodland (24%),  
161 heathland (35%), bog (5%), fen (4%) and wet tussock grassland (6%). For the plant elicitation, we  
162 assumed increases in temperature, decreases in precipitation (and less of that falling as snow, and  
163 fewer days of snow cover), and increased chance of fire. For the animal elicitation, we provided a  
164 specific climate scenario for the year 2050 (Table S3).

165 Expert-derived data is often aggregated in one of two ways, weighted or equally weighted. Our  
166 analysis focused on using equally weighted *best* estimates from experts. While expert uncertainty  
167 defined by their bounds and estimated confidence was collected in both workshops, it was not used  
168 in this analysis due to considerable variability in how experts interpreted, and thus, estimated their



169 bounds (see Supplemental Material).

170

## 171 ***Data Analysis***

### 172 **Calculation of summary statistics**

173 We calculated the mean and 95% confidence intervals under both current and future scenarios for  
174 each species or plant community type. Various data transformations were required to estimate the  
175 mean and confidence limits because estimates were bounded (e.g. percent cover and abundance). For  
176 the plant percent cover data, individual expert best estimates were first logit transformed and then  
177 both mean and 95% confidence limits were estimated. Inverse logit transformations were then applied  
178 to each summary statistic to convert these estimates back to a proportional scale. As the animal  
179 abundance estimates were based on species-specific spatial scales, we first re-scaled expert estimates  
180 to a standard spatial scale (i.e. 100 m<sup>2</sup>). As some experts included zeros in their best estimates of  
181 abundance and elevation estimates, we applied a small constant (0.1) prior to log transforming the  
182 data. Means and 95% confidence limits were then calculated and back transformed to their original  
183 scale. Means and confidence limits for expert estimates of elevation range (maximum elevation minus  
184 minimum elevation) were calculated on the raw scale (i.e. not transformed prior to estimation).  
185 Comparison between 'present' and 'future' estimates was done using 'inference by eye' (Cumming  
186 & Finch 2005) by examining whether the 95% confidence intervals crossed the 1:1 line in plots of  
187 current vs future estimates. Finally, we used individual expert current and future best estimates to  
188 calculate the proportion of experts that indicated increase, decrease or no change.

189

190 To determine whether the change projected by the experts for alpine plants correlated with available  
191 data on species traits or environmental attributes, we calculated a proportional change in cover  
192 estimated by each expert (See Supplementary Material). Means and confidence intervals were then  
193 estimated and used to calculate the spearman rank correlations between this proxy of adaptive

194 capacity and 1) a set of environmental measures derived from records in the Australian Virtual  
195 Herbarium and 2) plant functional trait data obtained from the experts' published and unpublished  
196 data, as well as other published and online sources and, for a few species, field specimens were  
197 collected to supplement available data.

198

199 De-identified data and code used to produce figures 1-4 and Supplementary figures S2-S4 can be  
200 found at: [https://github.com/jscamac/Alpine\\_Elicitation\\_Project](https://github.com/jscamac/Alpine_Elicitation_Project).

201

## 202 **Results**

### 203 *Predicted change in cover of Australian mountain vegetation types*

204 Most of alpine vegetation communities were predicted by the majority of experts to decline in extent  
205 (i.e. total cover in the landscape) with global change by 2050 (i.e. snowpatch, bog, fen, wetland  
206 complex, grassland/herbfield). All experts predicted that snowpatch and bog communities will  
207 decrease by 2050, whereas most experts predicted heathlands and woodlands would increase in extent  
208 (Fig 1A). There was more uncertainty among experts about the future of wet tussock grasslands and  
209 feldmark communities (Fig 1A). Communities that are currently restricted in extent across the  
210 Australian alpine landscape (<5% extent) were predicted to be the ones most likely to decline (Fig  
211 1B), but some of the more extensive communities (i.e. wetland complex, grassland/herbfield, which  
212 currently occupy ~25% of the landscape) were also predicted to decline in extent (Fig 1B).

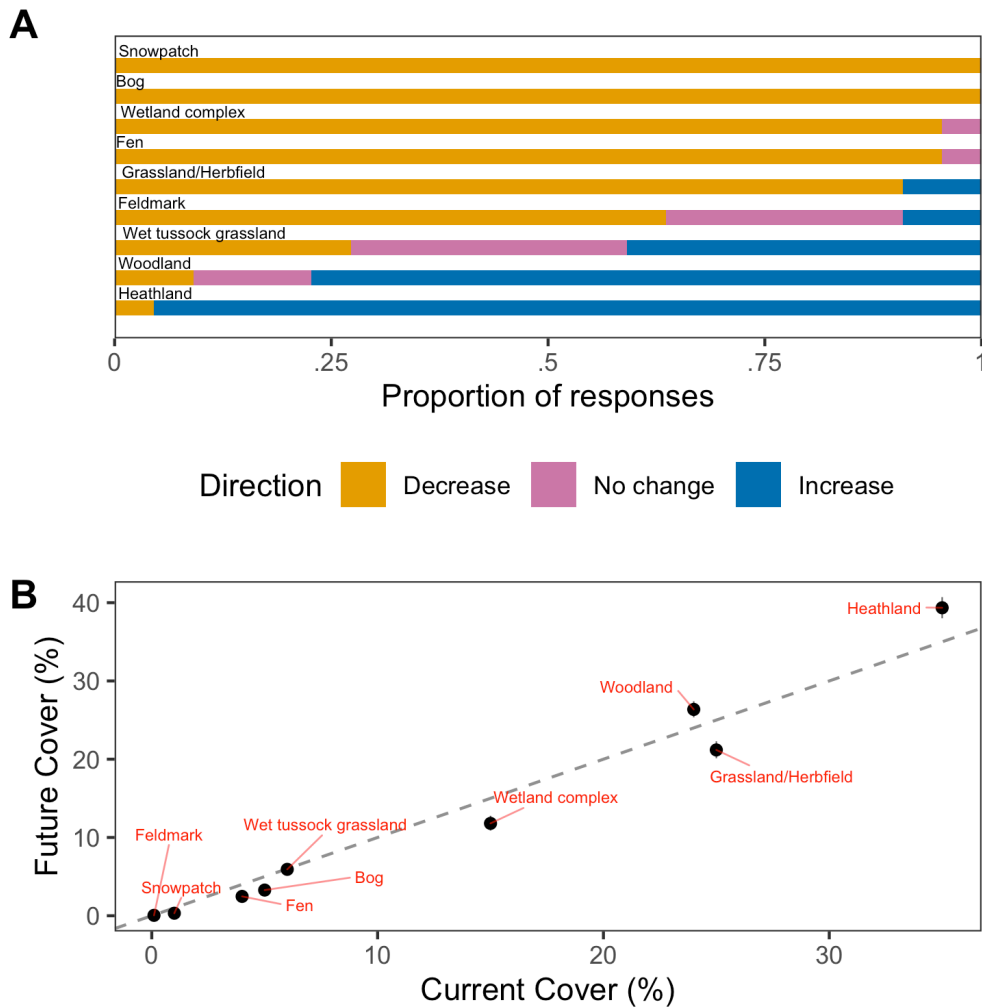

213

214 **Fig 1.** Nine Australian alpine plant community landscape cover predictions for 2050. A) The proportion of experts' ( $n =$   
 215 22) best estimates indicating a decline (orange), no change (pink) or increase (blue) in landscape cover between 2017 and  
 216 2050. B) Mean ( $\pm$  95% confidence intervals) of expert best estimates of community landscape cover for 2050. Records  
 217 below the dashed 1:1 line signify a decrease in cover, while those above the line signify an increase in cover. Assumed  
 218 current landscape covers were agreed upon by experts: Feldmark (0.1%), Snowpatch (1%), Grassland/Herbfield (25%),  
 219 Woodland (24%), Heathland (35%), Bog (5%), Fen (4%), Wet tussock grassland (6%).

220

### 221 ***Direction and magnitude of change in cover for individual plant species***

222 Within each plant community, experts predicted that the individual species' responses to global  
 223 change would vary (Fig 2). Some species, such as the snowpatch forb *Montia australasica* (#50 in  
 224 Fig 2) and the wetland moss *Sphagnum cristatum* (#38), were almost unanimously predicted to

225 decline in cover over time (Fig 2A). For other species, such as the subalpine heathland shrub *Hovea*  
226 *montana* (#22), experts predicted increases in cover (Fig 2A), although the magnitude of increase was  
227 small (Fig 2B). For most alpine plant species, there was much uncertainty about their future cover  
228 relative to current cover. The snowpatch graminoid *Rytidosperma nudiflorum* (#60), the wetland  
229 shrub *Baeckea gunniana* (#49), the grassland forb *Oreomyrrhis eriopoda* (#32), the heathland shrub  
230 *Acrothamnus montanus* (#17), the woodland forb *Styloidium montanum* (#1) and even the grassland  
231 structural dominant *Poa hiemata* (#27) were, according to experts, equally likely to show increases,  
232 decreases, or no change in cover (Fig 2B). This is reflected in the high uncertainty seen in future  
233 cover estimates (i.e. vertical error bars) for these species (Fig 2B).

234

235 Across all plant species, growth form was found to be relatively important in explaining expert  
236 judgements of species' adaptive capacity (Fig 2A). Woody plants (shrubs and one tree) were typically  
237 predicted to have higher adaptive capacity (i.e. show increases or no change in cover) relative to forbs  
238 and graminoids (Fig 2).

239

240 In general, plant species with current high cover in herbaceous communities (e.g. snow patches,  
241 grasslands and wetlands) were not predicted to become more dominant with climate change. Experts  
242 were uncertain about the future cover of many of these current high-cover herbaceous species (Fig  
243 2). For example, the graminoids *Poa costiniana* (#31, grasslands), *Poa fawcettiae* (#57, snowpatches)  
244 and the forb *Celmisia costiniana* (#56, snowpatches) were predicted by experts to either increase or  
245 decrease in cover in roughly equal numbers (Fig 2A). By contrast, in communities dominated by  
246 woody plants (heathlands, woodland), species with current high cover were predicted to increase their  
247 cover into the future (Fig 2B, e.g. *Hovea montana* #22, *Oxylobium ellipticum* #8).

248

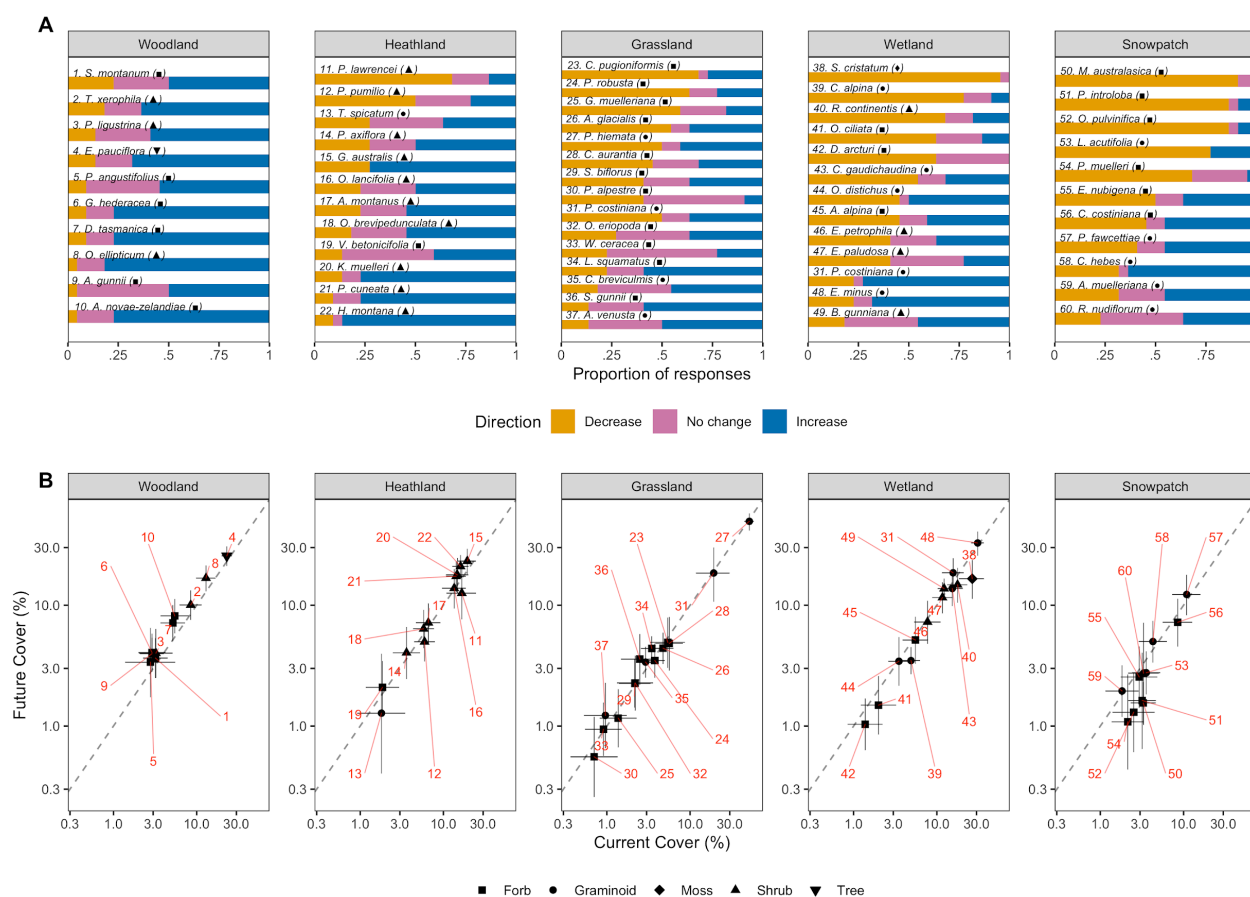

249

250 **Fig 2.** Sixty Australian alpine plants species cover predictions for 2017 and 2050. A) The proportion of experts' ( $n = 22$ )  
 251 best estimates indicating a decline (orange), no change (pink) or increase (blue) in cover between 2017 and 2050. B)  
 252 Mean ( $\pm 95\%$  confidence intervals) of expert best estimates of species cover for 2017 and 2050. Records above the dashed  
 253 1:1 line signify a decrease in cover, while those above the line signify an increase in cover. Species have been grouped  
 254 by the community type they most commonly occur in. Numbers signify species ID.

255

256 **Direction and magnitude of change in abundance and elevation range for individual**  
 257 **animal species**

258 Animal expert predictions showed considerable variability in responses to global change (Fig 3). For  
 259 nearly half the species ( $n = 13$ ), the majority of experts predicted a decline in abundance (Fig 3A).  
 260 The majority of experts suggested the Northern Corroboree Frog (*Pseudophryne pengellyi*, #18), the  
 261 Baw Baw Frog (*Philoria frosti*, #20), the Kosciuszko Galaxis fish (*Galaxias supremus*, #19) and the  
 262 Bogong Moth (*Agrotis infusa*, #1) would decline by 2050 (Fig 3A). For most of the remaining species,

263 the majority of experts predicted no change in abundance. For example, most experts suggested that  
264 the abundance of the Mountain Katydid (*Acripeza reticulata*, #16) and the Mountain Shrimp  
265 (*Anaspides tasmaniae*, #29) will not change by 2050 (Fig 3A). There was no species for which the  
266 majority of experts predicted an increase in abundance, but a notable proportion of experts predicted  
267 an increase in the abundance of the Thermocolour Grasshopper (*Kosciuscola tristis* #8). Experts were  
268 split equally between ‘increase’ and ‘no change’ for the Mountain Dragon (*Rankinia diemensis*, #17)  
269 and split equally between ‘decrease’ and ‘no change’ for the Alpine Darner (*Austroaeschna*  
270 *flavomaculata*, #28) (Fig 3A).

271

272 Examining the magnitude of change in abundance (Fig 3B), many species were predicted to decline  
273 by 2050, although in almost all cases these changes were small and uncertain (i.e. confidence limits  
274 cross the 1:1 line). The exceptions to this were the Mountain Dragon (*Rankinia diemensis*, #17) which  
275 is predicted to marginally increase — although this is uncertain — and both the Northern Corroboree  
276 Frog (*Pseudophryne pengellyi*, #18) and the Baw Baw Frog (*Philoria frosti*, #20), which are predicted  
277 to likely decrease in abundance. Examining species responses across water-centric and non-water-  
278 centric life histories revealed that, on average, non-water-centric species were expected not to change  
279 in abundance, while water-centric species were more likely to decline.

280

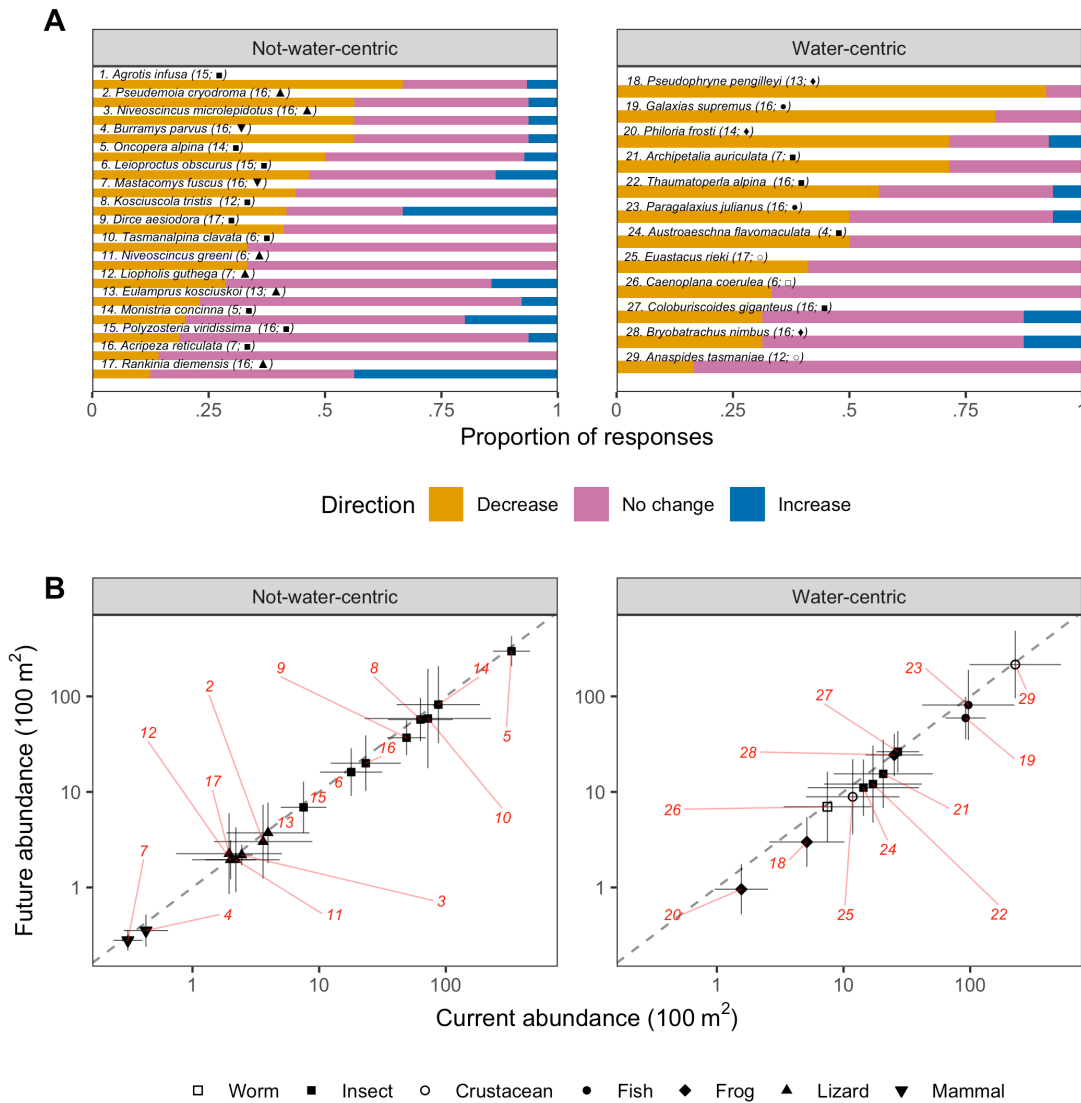

281

282 **Fig 3.** Twenty-nine Australian alpine animal species' abundance predictions for 2018 and 2050. A) The proportion of  
 283 experts best estimate indicating a decline (orange), no change (pink) or increase (blue) in cover in 2018 and 2050. B)  
 284 Mean ( $\pm$  95% confidence intervals) of expert best estimates of species abundance for 2018 and 2050. Records above the  
 285 dashed 1:1 line signify a decrease in abundance, while those above the line signify an increase in abundance. Species are  
 286 grouped by degree of dependency on water to complete their life-cycle as water-centric and non-water-centric. Numbers  
 287 signify species ID. Numbers in parentheses in panel (A) represent the number of experts who provided estimates  
 288 (Maximum = 17). Symbols represent higher taxon. Note: the bogong moth (*A. infusa*) has been omitted from panel B as  
 289 its abundance estimates were multiple orders of magnitude higher than other species.

290

291 With uncertainty, the minimum elevation limits of fauna distributions were predicted to shift upslope  
 292 for 24 of 29 species (Fig 4; right panels). The Mountain Pygmy Possum (*Burramys parvus*, #4) had

293 the largest predicted change in minimum elevation range-limit, expected to move up more than 150  
294 m. The Alpine Cool Skink (*Niveoscincus microlepidotus* #3), Alpine Bog Skink (*Pseudemoia*  
295 *cryodroma*, #2) and Alpine Plaster Bee (*Leioproctus obscurus*, #6) also show substantial departures  
296 from no change. No change in minimum elevation was predicted for the two species whose  
297 distributions, while predominantly contained within mountain regions, extend to sea level – the Blue  
298 Planarian (*Caenoplana coerulea*, #26) and the Mountain Katydid (*Acripeza reticulata*, #16). The  
299 maximum elevation limits were predicted to increase for 16 species (range 8-80 m) and decrease for  
300 11 species (range 1-80 m). Uncertainty encapsulated the 1:1 line for most species, but distinct  
301 increases in maximum elevation were predicted for the Mountain Dragon (*Rankinia diemensis*, #17).  
302 A conspicuous, but uncertain, reduction in maximum elevation was estimated for the alpine crayfish  
303 (*Euastacus reiki*, #25). For most species ( $n = 23$ ), the total elevation range occupied was predicted to  
304 shrink as a result of upward shifts at low elevation limits. Increases in elevational range were  
305 predicted for four species and only one species - the Blue Planarian (*C. coerulea*, #26) - was predicted  
306 to show no change in elevational range by 2050. The largest declines in species elevational range  
307 were predicted for the Mountain Pygmy Possum (*Burramys parvus*, #4, ~250 m reduction), the  
308 Northern Corroboree Frog (*P. pengilleyi*, #18, ~110 m reduction) and the Alpine Crayfish (*Euastacus*  
309 *reiki*, #25, ~105 m reduction).

310



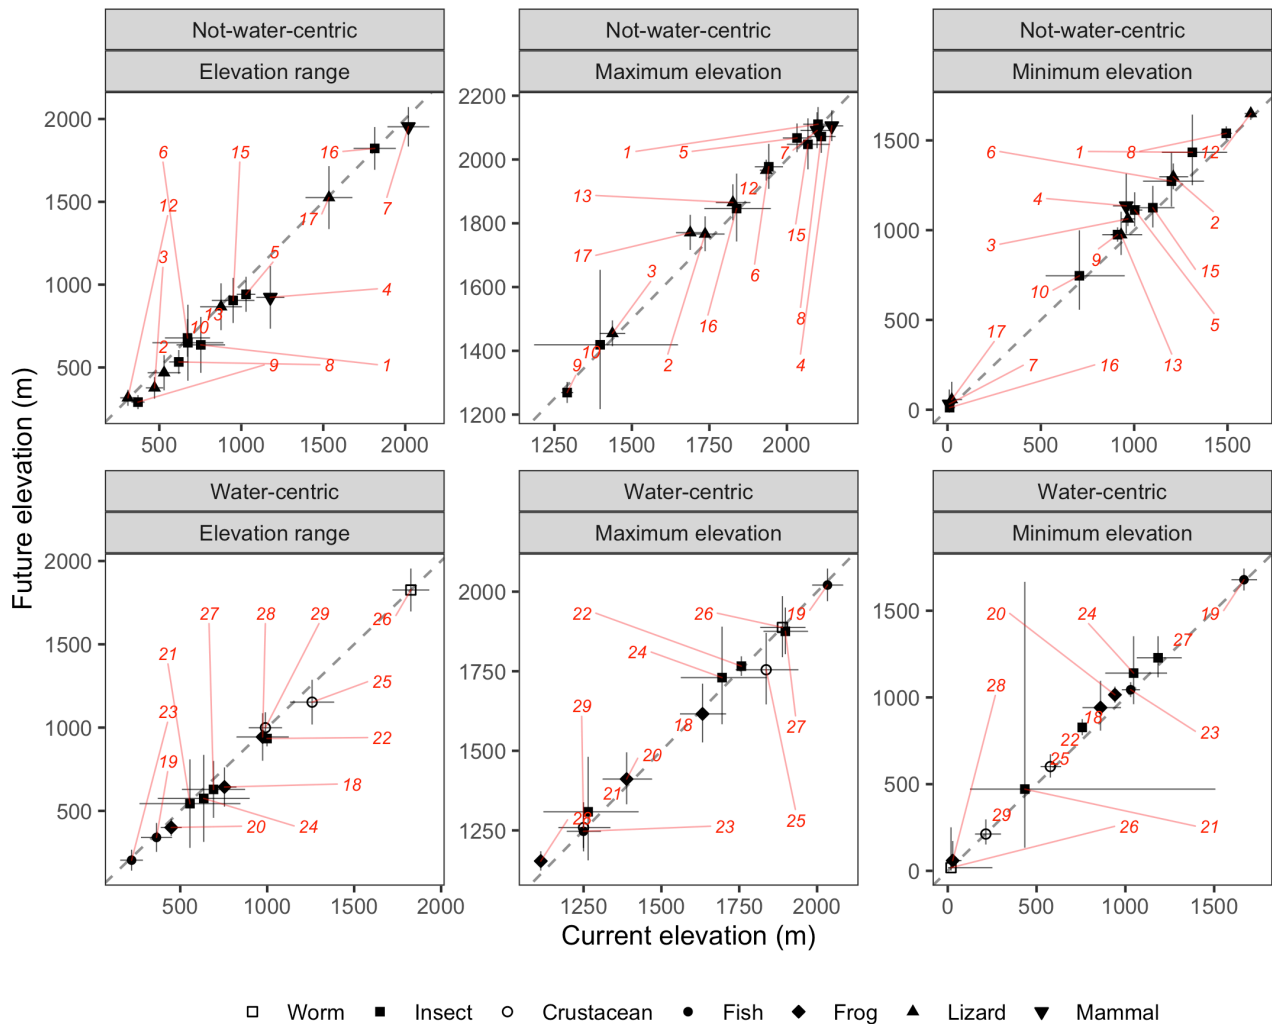

311

312 **Fig 4.** Australian alpine fauna species mean ( $\pm$  95% confidence intervals) elevation range (left panels); maximum  
 313 elevation (center panels) and minimum elevation (right panels) predictions for 2018 and 2050. Records below the dashed  
 314 1:1 line signify a decrease, while those above the line signify an increase. Species are grouped by degree of dependency  
 315 on water to complete their life-cycle, as water-centric and non-water-centric Numbers signify species ID (see Fig 3A).  
 316 Symbols represent taxon class.

317

### 318 *Expert opinion on drivers of adaptive capacity*

319 In the initial surveys, prior to the workshops, both plant and animal experts nominated genetic  
 320 variability and phenotypic plasticity as key determinants of adaptive capacity, with fecundity,  
 321 lifespan, and dispersal also considered important. However, notes and comments compiled during the

322 elicitation process suggested that experts referred more often to environmental and biotic attributes  
323 when considering drivers of change in cover/abundance for specific organisms. Climate niche-  
324 breadth, disturbance regimes (e.g. fire, frost events) and species interactions, including competitive  
325 ability in the face of native (e.g. shrubs and trees) or exotic species encroachment (e.g. Horses, deer,  
326 weeds), vulnerability to diseases (e.g. *Phytophthora cinnamoni*) and a dependence on other species  
327 (e.g. grazers, pollinators), dominated discussions about potential drivers of future change in alpine  
328 species abundance and/or distribution.

329

### 330 *Correlations of plant species attributes with expert predictions*

331 The projected magnitude of change in cover of plant species was correlated with environmental  
332 (Figure S2) and species range attributes (Figures S3 & S4). Adaptive capacity was most negatively  
333 correlated with species' minimum elevation ( $r = -0.561$ ) and most positively correlated with mean  
334 annual temperature range ( $r = 0.466$ ), elevation range ( $r = 0.561$ ) and area of occupancy ( $r = 0.43$ ),  
335 noting that these three variables are themselves highly correlated with each other. We found that our  
336 measure of adaptive capacity was not strongly correlated with the continuous species traits such as  
337 mean height ( $r = 0.286$ ), leaf area ( $r = -0.061$ ), specific leaf area ( $r = -0.05$ ), diaspore mass ( $r = 0.202$ )  
338 or dispersal distance ( $r = 0.342$ ).

339

## 340 **Discussion**

341 Conservation managers are increasingly required to make decisions about the allocation of finite  
342 resources to protect biodiversity under changing climate and disturbance regimes. Climate change  
343 impacts, however, are outpacing our capacity to collect data to assess individual risk empirically to  
344 inform resource allocation. A pragmatic alternative approach is to utilise expertise across taxa to  
345 produce timely estimates of conservation risk (Granger Morgan et al. 2001; Burgman et al. 2011a;

346 Martin et al. 2012). Experts' acquired experience allows them to provide valuable, nuanced insight  
347 into predictions about the future given a particular scenario. Our study has demonstrated the  
348 feasibility of a structured expert elicitation process for identifying the potential for adaptive capacity  
349 in Australian alpine plant communities, and individual animal and plant species. Adaptive capacity  
350 is the ability of systems and organisms to respond to consequences of change (IPCC 2014) and  
351 important for ecosystems undergoing rapid and substantial climate change such as alpine ecosystems  
352 (Steinbauer et al. 2018), tropical forests (Gallagher et al. 2019) and coral reefs (Silverstein et al.  
353 2012). We identified that some alpine species and communities are likely to be more vulnerable to  
354 global change by 2050 than others. Our exercise also identified species for which experts are  
355 equivocal and thus, targets for further investigation.

356

357 Expert judgement identified that the adaptive capacity of Australian alpine biota in the face of global  
358 change is, not surprisingly, likely to be species-specific. Here, the adaptive capacity estimates  
359 encompassed more than just species' responses to climate change; they also included structured  
360 consideration of all issues identified by experts such as a species' response to fire, invasive species,  
361 predation and interspecific competition. While this may seem self-evident, it is the first time that  
362 multiple species and communities in alpine Australia have been simultaneously assessed for their  
363 adaptive capacity and it provides a defensible basis for targeting monitoring of vulnerable species  
364 and communities, as well as the development of potential mitigation strategies for at-risk species.  
365 When given a plausible 2050 climate change scenario, incorporating the assumption that an extensive  
366 bushfire would occur during this period (which subsequently happened in early 2020; Nolan et al.  
367 2020), adaptive capacity was predicted to be lower in herbaceous plants relative to woody plants, and  
368 lower in water-centric animals relative to non-water-centric species. Adaptive capacity was not  
369 strongly correlated to quantitative plant traits such as specific leaf area or diaspore mass. This is  
370 perhaps unsurprising as such traits are thought to act on individual demographic rates (e.g. mortality,  
371 growth, fecundity), which themselves trade-off against one another. By contrast, adaptive capacity

372 (i.e. proportional cover change) is the outcome of the amalgamation of multiple such trade-offs – thus  
373 diminishing possible correlations with individual traits. Moreover, the amount of inter-specific  
374 variation explained by traits typically assumed to be strongly linked to demographic rates (e.g. wood  
375 density and tree mortality) have been shown to be small (e.g. Camac et al. 2018). Unlike correlative  
376 species distribution models which rely only on climate data and species occurrence data, experts  
377 undertaking structured judgements inherently consider physiological, ecological and evolutionary  
378 characteristics of species, as well as how those species might interact (or re-assemble) in novel  
379 assemblages, and how disturbance (from fire in our case) may affect their responses.

380

381 We found that experts came into the elicitation process with perceptions of key environmental and  
382 biotic drivers of species responses to global change but, after discussion with other experts, they  
383 refined these drivers. Prior to the elicitation process, experts emphasized characteristics of the focal  
384 species as being the most important predictors of their response to global change (e.g. genetic  
385 variability, phenotypic plasticity, fecundity, lifespan, dispersal). During discussion, experts shifted  
386 their thinking to include both biotic and environmental drivers as being of importance to predicting  
387 alpine biota response to global change (e.g. competitive ability, mutualisms, niche breadth). This  
388 shows the value of using a structured elicitation method relative to informal elicitation approaches  
389 (Krueger et al. 2012).

390

391 As might be expected, ‘rare’ species - defined by animal abundance (or elevational range) or plant  
392 cover - were typically predicted to become rarer with global change. Small population size and  
393 restricted habitat breadth are likely key reasons for such thinking amongst experts (Williams et al.  
394 2015; Cotto et al. 2017; Kobiv 2017). Terrestrial ectotherms (insects, reptiles, frogs), for example,  
395 are likely to face increased periods of heat stress (Hoffmann et al. 2013), while drought and declining  
396 snow cover duration make many plants and water-centric animals vulnerable (Wipf et al. 2009;  
397 Griffin & Hoffmann 2012; Williams et al. 2015). For many animals, experts predicted that species

398 with the narrowest elevational range on mountains (such as the Mountain Pygmy Possum) are most  
399 likely to further contract. Such processes are already occurring in mountain landscapes, with lower  
400 limit upward shifts in species having already been reported (Pauli et al. 2007; Freeman et al. 2018;  
401 Rumpf et al. 2019).

402

403 Unexpectedly, experts were uncertain about the future abundance/cover of some ‘common’ species.  
404 While some structural dominants in plant communities are forecast to be either likely ‘winners’ (e.g.  
405 shrubs such as *Hovea montana*, *Grevillea australis*, *Prostanthera cuneata*) or ‘losers’ under global  
406 change (e.g. the moss *Sphagnum cristatum* in alpine wetland bogs), which is in broad agreement with  
407 other studies (e.g. Williams et al. 2015; Camac et al. 2017), there was less agreement about others.  
408 *Poa hiemata*, a dominant and potentially long-lived tussock grass of alpine grasslands and herbfields,  
409 had uncertain adaptive capacity according to experts. We suspect that experts varied in the emphasis  
410 they placed on a long adult lifespan in limiting the adaptive capacity of local populations, with  
411 longevity buffering individual persistence in unsuitable sites at least in the short-term (Cotto et al.  
412 2017) but slowing evolutionary rates. Alternatively, experts were potentially weighting disturbance  
413 impacts, interspecific competition and climate sensitivity very differently (Granger Morgan et al.  
414 2001). Given such species are functionally important, provide most of the community biomass (both  
415 above- and below-ground), structure habitat for fauna, and provide ecosystem services such as  
416 erosion control (i.e. they act as ‘foundation species’, Ellison & Degrassi 2017), understanding the  
417 autecology and dynamics of dominant species in response to global change drivers appears to be a  
418 key research need. Indeed, the uncertainty around common species responses highlights that long-  
419 term cover/abundance trends need to be quantified if future ecosystem stability is to be understood,  
420 a call that has been made repeatedly in the literature (Smith & Knapp 2003; Gaston & Fuller 2007;  
421 Gaston 2011; Smith et al. 2020). Monitoring species’ local abundance may therefore better inform  
422 species’ extinction risks in alpine areas under global change than monitoring their range (Cotto et al.  
423 2017).

424

425 Overall, the change in cover of plant species, or elevational range and abundance change for animals,  
426 were estimated to be modest despite some climatic effects already becoming evident in Australia's  
427 alpine biota (e.g. Camac et al. 2017; Hoffmann et al. 2019); estimates for cover change in plant  
428 communities were more pronounced. This may reflect that scientific experts are typically  
429 conservative when estimating the future (Oppenheimer et al. 2019). Experts also likely view biotic  
430 response to global change as a time-lagged process (i.e. 'disequilibrium dynamics', Svenning &  
431 Sandel 2013). Lags occur because of the limited ability of species to disperse to new areas (Morgan  
432 & Venn 2017; Alexander et al. 2018), establishment limitations following their arrival (Graae et al.  
433 2011; HilleRisLambers et al. 2013; Camac et al. 2017), and the extinction debt of resident species  
434 (Dullinger et al. 2012). By forecasting only to 2050, experts have indicated that many longer-lived  
435 species will potentially persist through the initial ongoing change, but their capacity to do so beyond  
436 this is not assured. Lastly, biologists may find it difficult to estimate the rate of change. Most models  
437 of global change impacts are based on short-term experiments and have typically focused on  
438 differences or ratios of state variables (e.g. control vs manipulated groups). While these models are  
439 useful for inferring the direction of impacts (which implicitly inform expert views), they often do not  
440 provide information on the rate of change, the fundamental process needed to accurately forecast the  
441 magnitude of change (Camac et al. 2015; Morgan et al. 2016).

442

### 443 ***Applicability of IDEA methodology to ecological problems***

444 The IDEA protocol has been tested in a variety of application areas (Speirs-Bridge et al. 2010;  
445 Burgman et al. 2011a; McBride et al. 2012; Wintle et al. 2012, Hanea et al. 2016) and these tests  
446 consistently confirmed the value of using a diverse group of experts, of giving experts the opportunity  
447 to cross examine the estimates of their peers, and of reducing ambiguity through discussion. In our  
448 elicitations, we speculate that experts revised their initial estimates if they (i) had no direct knowledge  
449 of the species themselves but were guided by the discussion, (ii) aligned responses to those of a taxon

450 specialist, or (iii) adjusted their values based upon a particular line of reasoning they found convincing  
451 during the discussion. Most validation studies found that when experts revise their estimates, they do  
452 so in the direction of the “truth” (e.g. Burgman et al. 2011b; Hanea et al. 2018).

453

454 One difficulty in using this methodology was revealed at both workshops - the capacity of the  
455 participants to undertake this particular kind of statistical estimation. Gigerenzer & Edwards (2003)  
456 and many others (e.g. Low Choy et al. 2009) have previously documented the difficulties experts  
457 have when communicating knowledge in numbers and probabilities. We attempted a four point  
458 elicitation with the plant experts for each species (1. lowest plausible value, 2. highest plausible value,  
459 3. best estimate and 4. confidence that the truth falls between their lower and upper limits), and  
460 revised this down to a three point elicitation for the animal experts (by omitting the confidence  
461 estimate, and fixing the upper and lower limits to correspond to a central 90% credible interval).  
462 While experts were comfortable in providing best estimates, there was inconsistency (indeed  
463 confusion) about interpreting and estimating bounds and confidence - even after conducting a brief  
464 workshop outlining how to do it. For these reasons, our analysis focused on using each expert’s best  
465 estimates and not their estimated uncertainty defined by bounds and estimated confidence. Potentially  
466 valuable information about the confidence in estimates was therefore lost during the elicitation  
467 process. However, the IDEA protocol strives to elicit improved best estimates by eliciting bounds  
468 first. Even if the bounds are not used as a measure of the expert’s uncertainty, the counterfactual  
469 thinking needed prior to eliciting the best estimates improves the latter. We feel that the ‘best  
470 estimate’ of cover or abundance is useful for forecasting the direction and magnitude of change  
471 expected by experts under a given global change scenario. Moreover, we believe that involving a  
472 mechanism for discussing and revising estimates (through the IDEA protocol) provides robust  
473 insights into these potential changes.

474

475 ***Management Implications***



476 The adaptive capacity framework we used to elicit expert opinions about how alpine species and  
477 communities may respond to global change currently exists as a framework of “exposure risk” to  
478 change based on current state and predicted future state (i.e. our species prediction biplots). Our  
479 experts, through their judgment, implicitly accounted for multiple drivers of change in mountain  
480 ecosystems (e.g. rising temperatures, biotic interactions, feral animals, fire) but did so assuming no  
481 mitigation by management occurred. Using this approach, experts predicted that several plant (e.g.  
482 *Sphagnum cristatum*) and animal species (e.g. Baw Baw Frog *Philoria frosti*, Northern Corroboree  
483 Frog *Pseudophryne pengellyi*, and Mountain Pygmy Possum *Burramys parvus*) appear very  
484 vulnerable to the changes in alpine areas that are predicted to occur by 2050.

485

486 If the value of the framework is to identify the species that are most vulnerable to global change (i.e.  
487 the species with limited adaptive capacity), then it becomes important to consider our capacity to  
488 influence adaptive capacity into the future through management intervention. This will be of most  
489 relevance to land managers and conservation biologists who want to reduce the risk of species  
490 extinction. We believe this will be critical to operationalise the expert judgment outcomes reported  
491 here. Having identified in our biplots which species have lower adaptive capacity, managers may  
492 begin to ask: how might we buffer them against climate change? Or, how can we improve the  
493 resilience of alpine species? There are many management actions that can reduce threats and these  
494 are already part of a land manager’s current arsenal such as removing feral animals and weeds,  
495 protecting vulnerable communities from fire and assisted migration.

496

497 If management actions could improve the adaptive capacity of alpine species, and these actions could  
498 be ranked for their efficacy to achieve such aims, then the expert judgements we have elicited in this  
499 study can be used to inform prioritisation for conservation actions in regions such as the Australian  
500 Alps. Hence, not only can we use a species’ adaptive capacity as a means to rank species in need of  
501 mitigation action, but we could identify the species most likely to respond to management



502 interventions. Indeed, such an approach may even identify that, for some species, there is nothing that  
503 we can practically do to change their adaptive capacity. In such cases, it may be that options such as  
504 *ex situ* conservation strategies (such as seed banking, captive breeding) need to be implemented.

505

506 In an era of rapid change, conservation practitioners and land managers do not have the privilege of  
507 time to wait for additional data and knowledge to be accrued to inform their decisions. They must  
508 utilise information currently at hand to prioritise conservation efforts so that species losses may be  
509 mitigated. We believe the method and outcomes outlined here can provide a pragmatic and coherent  
510 basis for integrating available expert knowledge to quantify adaptive capacity and perhaps help  
511 mitigate the overwhelming risk posed by global change to the long-term persistence of Australian  
512 alpine species.

513

## 514 **Acknowledgements**

515 This study was supported by funding from the National Climate Change Adaptation Research  
516 Facility National Adaptation Network for Natural Ecosystems (vegetation) and the Centre for  
517 Biodiversity Analysis, ANU and the NSW Dept. of Industry Conference Support Program  
518 (animals). Sandra Lavorel, Mel Schroder and Libby Rumpff helped refine our study scope and  
519 questions. We thank all experts who participated in the structured elicitation workshops. We also  
520 thank Linda Broome, Nick Clemann, Elaine Thomas and Phil Zylstra, who provided participants  
521 with critical information that was used to inform their estimates. Lastly, we thank Nola Umbers for  
522 taking on caring responsibilities for KU. The flora elicitation workshop was approved by the  
523 Human Ethics Committee of La Trobe University (Project Number: S17-069). The fauna elicitation  
524 workshop was approved by the Human Ethics Committee of Western Sydney University (Project  
525 Number: H12680).

526

## 527 **Literature Cited**

- 528 Alexander JM, Chalmandrier L, Lenoir J, Burgess TI, Essl F, Haider S, Kueffer C, McDougall K, Milbau A,  
529 Nuñez MA, Pauchard A, Rabitsch W, Rew LJ, Sanders NJ, Pellissier L. 2018. Lags in the response of mountain  
530 plant communities to climate change. *Global Change Biology* **24**: 563–579.
- 531 Briscoe NJ, Elith J, Salguero-Gómez R, Lahoz-Monfort JJ, Camac JS, Giljohann KM, Holden MH, Hradsky  
532 BA, Kearney MR, McMahon SM, Phillips BL, Regan TJ, Rhodes JR, Veski PA, Wintle BA, Yen JD, Guillera-  
533 Arroita G. 2019. Forecasting species range dynamics with process-explicit models: matching methods to  
534 applications. *Ecology Letters* **22**: 1940-1956.
- 535 Burgman M, Carr A, Godden L, Gregory R, McBride M, Flander L, Maguire L. 2011a. Redefining expertise  
536 and improving ecological judgment. *Conservation Letters* **4**: 81–87.
- 537 Burgman MA, McBride M, Ashton R, Speirs-Bridge A, Flander L, Wintle B, Fidler F, Rumpff L, Twardy C.  
538 2011b. Expert status and performance. *PLoSOne* **6**: 1-7.
- 539 Camac JS, Williams RJ, Wahren C-H, Jarrad F, Hoffmann AA, Veski PA. 2015. Modeling rates of life form  
540 cover change in burned and unburned alpine heathland subject to experimental warming. *Oecologia* **178**:  
541 615-628.
- 542 Camac JS, Williams RJ, Wahren C-H, Hoffmann AA, Veski PA. 2017. Climatic warming strengthens a  
543 positive feedback between alpine shrubs and fire. *Global Change Biology* **23**: 3249-3258.
- 544 Camac JS, Condit R, FitzJohn RG, McCalman L, Steinberg D, Westoby M, Wright SJ, Falster DS. 2018.  
545 Partitioning mortality into growth-dependent and growth-independent hazards across 203 tropical tree  
546 species. *Proceedings of the National Academy of Sciences* **115**: 12459-12464.
- 547 Cotto O, Wessely J, Georges D, Klöner G, Schmid M, Dullinger S, Thuiller W, Guillaume F. 2017. A  
548 dynamic eco-evolutionary model predicts slow response of alpine plants to climate warming. *Nature*  
549 *Communications* **8**: 15399.

- 550 Cumming G, Finch S. 2005. Inference by eye: confidence intervals and how to read pictures of data.  
551 *American Psychologist* **60**: 170-80.
- 552 Dawson TP, Jackson ST, House JI, Prentice IC, Mace GM. 2011. Beyond predictions: biodiversity  
553 conservation in a changing climate. *Science* **332**: 53–58.
- 554 Dullinger S, Gatttringer A, Thuiller W, Moser D, Zimmermann NE, Guisan A, Willner W, Plutzer C, Leitner  
555 M, Mang T, Caccianiga M, Dirnbock T, Ertl S, Fischer A, Lenoir J, Svenning J-C, Psomas A, Schmatz DR,  
556 Silc U, Vittoz P, Hulber K. 2012. Extinction debt of high-mountain plants under twenty-first-century climate  
557 change. *Nature Climate Change* **2**: 619-622.
- 558 Ellison AE, Deggrasi AL. 2017. All species are important, but some species are more important than others.  
559 *Journal of Vegetation Science* **28**: 669-671.
- 560 Foden WB, Butchart SHM, Stuart SN, Vie' J-C, Akcakaya HR, et al. 2013. Identifying the world's most  
561 climate change vulnerable species: a systematic trait-based assessment of all birds, amphibians and corals.  
562 *PLoS ONE* **8**: e65427.
- 563
- 564 Foden WB, Young BE Akcakaya HR, Garcia RA, Hoffmann AA, et al. 2018. Climate change vulnerability  
565 assessment of species. *Wiley Interdisciplinary Reviews Climate Change* **10**: e551
- 566
- 567 Fordham DA, Resit Akçakaya H, Araújo MB, Elith J, Keith DA, Pearson R, Auld TD, Mellin C, Morgan  
568 JW, Regan TJ, Tozer M, Watts MJ, White M, Wintle BA, Yates C, Brook BW. 2012. Plant extinction risk  
569 under climate change: are forecast range shifts alone a good indicator of species vulnerability to global  
570 warming? *Global Change Biology* **18**: 1357-1371.
- 571
- 572 Freeman BG, Lee-Yaw JA, Sunday JM, Hargreaves AL (2018) Expanding, shifting and shrinking: the  
573 impact of global warming on species' elevational distributions. *Global Ecology and Biogeography* **27**: 1268-  
574 1276.
- 575

- 576 Gallagher RV, Allen S, Wright IJ. 2019. Safety margins and adaptive capacity of vegetation to climate  
577 change. *Scientific Reports* **9**: 8241.
- 578
- 579 Gaston KJ. 2011. Common ecology. *BioScience* **61**: 354-362.
- 580
- 581 Gaston KJ, Fuller RA. 2007. Commonness, population depletion and conservation biology. *Trends in*  
582 *Ecology and Evolution* **23**: 14-19.
- 583
- 584 Geiser F, Broome LS. 1991. Hibernation in the mountain pygmy possum *Burramys parvus* (Marsupialia).  
585 *Journal of Zoology* **223**: 593-602.
- 586
- 587 Geyer J, Kiefer I, Kreft S, Chavez V, Salafsky N, et al. 2011. Classification of climate-change-induced  
588 stresses on biological diversity. *Conservation Biology* **25**: 708-715.
- 589
- 590 Gibson-Reinemer DK, Rahel FJ. 2015. Inconsistent range shifts within species highlight idiosyncratic  
591 responses to climate warming. *PLoS ONE* **10**: e0132103.
- 592
- 593 Gigerenzer G, Edwards A. 2003. Simple tools for understanding risks: from innumeracy to insight. *BMJ*:  
594 *British Medical Journal* **327**: 741-744.
- 595
- 596 Graae BJ, Ejrnæs R, Lang SI, Meineri E, Ibarra PT, Bruun HH. 2011. Strong microsite control of seedling  
597 recruitment in tundra. *Oecologia* **166**: 565-576.
- 598
- 599 Grabherr G, Gottfried M, Pauli H. 1994. Climate effects on mountain plants. *Nature* **369**: 448.
- 600
- 601 Granger Morgan M, Pitelka LF, Shevliakova E. 2001. Elicitation of expert judgments of climate change  
602 impacts on forest ecosystems. *Climatic Change* **49**: 279-307.
- 603 Green K, Osborne W. 1994. *Wildlife of the Australian Snow-Country*. Reed Press, Sydney.

604

605 Green K, Slatyer R. 2020. Arthropod community composition along snowmelt gradients in snowbeds in the  
606 Snowy Mountains of south-eastern Australia. *Austral Ecology* **45**: 144-157.

607

608 Green K, Stein JA. 2015. Modeling the thermal zones and biodiversity on the high mountains of Meganesia:  
609 the importance of local differences. *Arctic, Antarctic, and Alpine Research* **47**: 671-680.

610

611 Griffin PC, Hoffmann AA. 2012. Mortality of Australian alpine grasses (*Poa* spp.) after drought: species  
612 differences and ecological patterns. *Journal of Plant Ecology* **5**: 121-133.

613

614 Guisan A, Thuiller W. 2005. Predicting species distribution: offering more than simple habitat models.  
615 *Ecology Letters* **8**: 993-1009.

616

617 Halloy SRP, Mark AF. 2003. Climate-change effects on alpine plant biodiversity: a New Zealand  
618 perspective on quantifying the threat. *Arctic, Antarctic, and Alpine Research* **35**: 248-254.

619

620 Hanea A, McBride M, Burgman M, Wintle B, Fidler F, Flander L Twardy, CR, Manning B, Mascaro S.  
621 2016. Investigate Discuss Estimate Aggregate for structured expert judgement. *International Journal of*  
622 *Forecasting* **33**: 267–269.

623

624 Hanea AM, McBride MF, Burgman MA, Wintle BC. 2018. The value of performance weights and  
625 discussion in aggregated expert judgments. *Risk Analysis* **38**: 1781-1794

626 Hargreaves AL, Samis KE, Eckert CG. 2014. Are species' range limits simply niche limits writ large? A  
627 review of transplant experiments beyond the range. *The American Naturalist* **183**: 157-173.

628 Hemming V, Burgman MA, Hanea AM, McBride MF, Wintle BC. 2018. A practical guide to structured  
629 expert elicitation using the IDEA protocol. *Methods in Ecology and Evolution* **9**: 169-181.

- 630 HilleRisLambers J, Harsch MA, Ettinger AK, Ford KR, Theobald EJ. 2013. How will biotic interactions  
631 influence climate change–induced range shifts? *Annals of the New York Academy of Sciences* **1297**: 112-  
632 125.
- 633 Hoffmann AA, Chown SL, Clusella-Trullas S. 2013. Upper thermal limits in terrestrial ectotherms: how  
634 constrained are they? *Functional Ecology* **27**: 934-949.
- 635 Hoffmann AA, Rymer PD, Byrne M, Ruthrof KX, Whinam J, McGeoc M, Bergstrom DM, Guerin GR,  
636 Sparrow B, Joseph L, Hill SJ, Andrew NR, Camac J, Bell N, Riegler M, Gardner JL, Williams SE. 2019.  
637 Impacts of recent climate change on terrestrial flora and fauna: Some emerging Australian examples. *Austral*  
638 *Ecology* **44**: 3-27
- 639 Holling C. 1973. Resilience and stability of ecological systems. *Annual Review of Ecology and Systematics*  
640 **4**: 1-23.
- 641 IPCC 2014. Glossary. Intergovernmental Panel on Climate Change.
- 642 Kirkpatrick JB, Bridle KL. 1999. Environment and floristics of ten Australian alpine vegetation formations.  
643 *Australian Journal of Botany* **47**: 1-21.
- 644 Kobiv Y. 2017. Response of rare alpine plant species to climate change in the Ukrainian Carpathians. *Folia*  
645 *Geobotania* **52**: 217-226.
- 646 Krueger T, Page T, Hubacek K. Smith L, Hiscock K. 2012. The role of expert opinion in environmental  
647 modelling. *Environmental Modelling & Software* **36**: 4-18.
- 648 La Sorte FA, Jetz W. 2010. Projected range contractions of montane biodiversity under global warming.  
649 *Proceedings of the Royal Society B: Biological Sciences* **277**: 3401-3410.
- 650 Lawler JJ, Shafer S. L, White D, Kareiva P, Maurer EP, Blaustein AR, Bartlein PJ. 2009. Projected climate-  
651 induced faunal change in the Western Hemisphere. *Ecology* **90**: 588-597.
- 652 Lenoir J, Gegout JC, Marquet PA, De Ruffray P, Brisse H. 2008. A significant upward shift in plant species  
653 optimum elevation during the 20th century. *Science* **320**: 1768-1771.

- 654 Lenoir J, Gégout J.-C, Guisan A, Vittoz P, Wohlgemuth T, Zimmermann NE, et al. 2010. Going against the  
655 flow: potential mechanisms for unexpected downslope range shifts in a warming climate. *Ecography* **33**:  
656 295-303.
- 657 Louthan AM, Doak DF, Angert AL. 2015. Where and when do species interactions set range limits? Trends  
658 in Ecology and Evolution **30**: 780-792.
- 659 Low Choy S, O'Leary R, Mengersen K. 2009. Elicitation by design in ecology: using expert opinion to  
660 inform priors for Bayesian statistical models. *Ecology* **90**: 265-277.
- 661 Martin TG, Burgman MA, Fidler F, Kuhnert PM, Low-Choy S, McBride M, Mengersen K. 2012. Eliciting  
662 expert knowledge in conservation science. *Conservation Biology* **26**: 29-38.
- 663 McGowan H, Callow JN, Soderholm J, McGrath G, Campbell M, Zhao J-X. 2018. Global warming in the  
664 context of 2000 years of Australian alpine temperature and snow cover. *Scientific Reports* **8**: 4394.
- 665 Michalet R, Schöb C, Lortie CJ, Brooker RW, Callaway RM. 2014. Partitioning net interactions among  
666 plants along altitudinal gradients to study community responses to climate change. *Functional Ecology* **28**:  
667 75-86.
- 668 Millenium Ecosystem Assessment 2005. *Ecosystems and Human Well-Being: Synthesis*. Island Press,  
669 Washington.
- 670 Morgan JW, Dwyer JM, Price JN, Prober SM, Power SA, Firn J, Moore JL, Wardle GM, Seabloom EW,  
671 Borer ET, Camac JS. 2016. Species origin affects the rate of response to inter-annual growing season  
672 precipitation and nutrient addition in four Australian native grasslands. *Journal of Vegetation Science* **27**:  
673 1164-1176.
- 674 Morgan JW, Venn SE. 2017. Alpine plant species have limited capacity for long-distance seed dispersal,  
675 *Plant Ecology* **218**: 813-819.
- 676 Nolan RH, Boer MM, Collins L, Resco de Dios V, Clarke H, Jenkins M, Kenny B, Bradstock RA. 2020.  
677 Causes and consequences of eastern Australia's 2019–20 season of mega-fires. *Global Change Biology* **26**:  
678 1039-1041.

- 679 Normand S, Zimmermann NE, Schurr FM, Lischke H. 2014. Demography as the basis for understanding and  
680 predicting range dynamics. *Ecography* **37**: 1149-1154.
- 681 Ofori BY, Stow AJ, Baumgartner JB, Beaumont LJ. 2017. Influence of adaptive capacity on the outcome of  
682 climate change vulnerability assessment. *Scientific Reports* **7**: 12979.
- 683
- 684 Oppenheimer M, Oreskes N, Jamieson D, Brysse K, O'Reilly J, Shindell M, Wazek M. 2019. Discerning  
685 Experts: The Practices of Scientific Assessment for Environmental Policy. University of Chicago Press,  
686 Chicago.
- 687
- 688 Pauli H, Gottfried M, Reiter K, Klettner C, Grabherr G. 2007. Signals of range expansions and contractions  
689 of vascular plants in the high Alps: observations (1994–2004) at the GLORIA master site Schrankogel,  
690 Tyrol, Austria. *Global Change Biology* **13**: 147-156.
- 691
- 692 Rumpf SB, Hülber K, Zimmermann NE, Dullinger S. 2019. Elevational rear edges shifted at least as much as  
693 leading edges over the last century. *Global Ecology and Biogeography* **28**: 533-543.
- 694
- 695 Sanchez-Bayo F, Green K. 2013. Australian snowpack disappearing under the influence of global warming  
696 and solar activity. *Arctic, Antarctic, and Alpine Research* **45**: 107-118.
- 697
- 698 Silverstein RN, Correa AM, Baker AC. 2012. Specificity is rarely absolute in coral-algal symbiosis:  
699 implications for coral response to climate change. *Proceedings of the Royal Society B*. **279**: 2609-2618.
- 700
- 701 Smith MD, Knapp AK. 2003. Dominant species maintain ecosystem function with non-random species loss.  
702 *Ecology Letters* **6**: 509-517.
- 703
- 704 Smith MD, Koerner SE, Knapp AK, Avolio ML, Chaves FA, Denton EM, Dietrich J, Gibson DJ, Gray J,  
705 Hoffman AM, Hoover DL, Komatsu KJ, Silletti A, Wilcox KR, Yu Q, Blair JM (2020) Mass ratio effects  
706 underlie ecosystem responses to environmental change. *Journal of Ecology* **108**: 855-864.



707

708 Speirs-Bridge A, Fidler F, McBride M, Flander L, Cumming G, Burgman M. 2010. Reducing  
709 overconfidence in the interval judgments of experts. *Risk Analysis* **30**: 512-523.

710

711 Steinbauer MJ, et al. 2018. Accelerated increase in plant species richness on mountain summits is linked to  
712 warming. *Nature* **556**: 231.

713

714 Steinbauer K, Lamprecht A, Semenchuk P, Winkler M, Pauli H. 2020. Dieback and expansions: species-  
715 specific responses during 20 years of amplified warming in the high Alps. *Alpine Botany* **130**: 1-11.

716

717 Svenning J-C, Sandel B. 2013. Disequilibrium vegetation dynamics under future climate change. *American*  
718 *Journal of Botany* **100**: 1266-1286.

719

720 Tingley MW, Koo MS, Moritz C, Rush AC, Beissinger SR. 2012. The push and pull of climate change  
721 causes heterogeneous shifts in avian elevational ranges. *Global Change Biology* **18**: 3279-3290.

722

723 Umbers KDL, Mappes J. 2015. Postattack deimatic display in the mountain katydid, *Acripeza reticulata*,  
724 *Animal Behaviour* **100**: 68-73.

725

726 Venn S, Kirkpatrick JB, McDougall K, Walsh N, Whinam J, Williams RJ. 2017. Alpine, sub-alpine and  
727 sub-Antarctic vegetation of Australia. In: D.A. Keith (ed.), *Australian Vegetation*. pp. 461-490. Cambridge  
728 University Press, Cambridge.

729

730 Warrant E, Frost B, Green K, Mouritsen H, Dreyer D, Adden A, Brauburger K, Heinze S. 2016. The  
731 Australian Bogong Moth *Agrotis infusa*: a long-distance nocturnal navigator. *Frontiers in Behavioral*  
732 *Neuroscience* 10: 77. doi: 10.3389/fnbeh.2016.00077

733

734 Wahren C-H, Camac JS, Jarrad FC, Williams RJ, Papst WA, Hoffmann AA. 2013. Experimental warming  
735 and long-term vegetation dynamics in an alpine heathland. *Australian Journal of Botany* **61**: 36-51.

- 736 Williams RJ, McDougall KL, Wahren C.-H, Rosengren NJ, Papst WA. 2006. Alpine landscapes. In:  
737 Ecology: an Australian Perspective (eds. P. M. Attiwill & B. Wilson), pp. 557-72. Oxford University Press,  
738 Oxford.
- 739 Williams RJ, Papst WA, McDougall KL, et al. 2014. Alpine ecosystems. In: Biodiversity and Environmental  
740 Change: Monitoring, Challenges and Directions (eds. D. Lindenmayer, E. Burns, N. Thurgate & A. Lowe),  
741 pp. 167-212. CSIRO Publishing, Melbourne.
- 742 Williams RJ, Wahren C.-H, Stott KAJ, Camac JS, White M, Burns E, Harris S, Nash M, Morgan JW, Venn  
743 S, Papst WA, Hoffmann AA. 2015. An International Union for the Conservation of Nature Red List  
744 ecosystems risk assessment for alpine snow patch herbfields, south-eastern Australia. *Austral Ecology* **40**:  
745 433-443.
- 746 Wilson RJ, Gutiérrez D, Gutiérrez J, Martínez D, Agudo R, Monserrat VJ. 2005. Changes to the elevational  
747 limits and extent of species ranges associated with climate change. *Ecology Letters* **8**: 1138-1146.
- 748 Wintle BC, Fidler F, Vesk PA, Moore JL. 2012. Improving visual estimation through active feedback.  
749 *Methods in Ecology and Evolution* **4**: 53–62.
- 750 Wipf S, Stoeckli V, Bebi P. 2009. Winter climate change in alpine tundra: plant responses to changes in  
751 snow depth and snowmelt timing. *Climatic Change* **94**: 105-121.
- 752 Zylstra PJ. 2018. Flammability dynamics in the Australian Alps. *Austral Ecology* **43**: 578-591.
- 753
